# Supplementary material
Source: PubMed Central journal article supplement (PMC9181506)
Supplement: NIHMS1668553-supplement-Supplementary_Material_appendix.pdf [file NIHMS1668553-supplement-Supplementary_Material_appendix.pdf]

# Supplemental Appendix

Comparison of Decision Modeling Approaches for Health Technology and Policy Evaluation

John Graves, Shawn Garbett, Zilu Zhou, Jonathan Schildcrout, Josh Peterson

## Contents

|          |                                                              |           |
|----------|--------------------------------------------------------------|-----------|
| <b>1</b> | <b>Probabilistic Sensitivity Analysis</b>                    | <b>2</b>  |
| <b>2</b> | <b>How Does Truncation Error Affect Model Variability?</b>   | <b>4</b>  |
| <b>3</b> | <b>Why do Microsimulation results not converge with DEQ?</b> | <b>5</b>  |
| <b>4</b> | <b>Markov Modeling: Best Practices, Code and Examples</b>    | <b>5</b>  |
| 4.1      | Rates vs. Percentages . . . . .                              | 6         |
| 4.2      | Competing Events . . . . .                                   | 7         |
| 4.3      | State Jumping . . . . .                                      | 10        |
| 4.4      | Non-stationary Rates . . . . .                               | 10        |
| <b>5</b> | <b>Tunnel States</b>                                         | <b>11</b> |
| <b>6</b> | <b>Rescaling and Integration</b>                             | <b>11</b> |
| <b>7</b> | <b>From Soup to Nuts: A Fully-Executed Example</b>           | <b>12</b> |
| 7.1      | Numerical Checkpoint . . . . .                               | 14        |

# 1 Probabilistic Sensitivity Analysis

While we pre-specify all parameters in our application (i.e., each parameter's true value is known with certainty) it is still useful to demonstrate how each model type performs under a probabilistic sensitivity analysis (PSA) in which uncertainty distributions are assigned to each parameter. We can then use these PSA results to construct cost-effectiveness acceptability frontiers that show regions in which decision outcomes would be different depending on the model structure used.

To efficiently carry out this exercise, we ran an  $K=1,000$  PSA based on draws from a Halton sequence.<sup>1</sup> This Halton sequence was then mapped (via inverse cumulative distribution functions) to produce a set of 1,000 parameter draws from the distributions specified in the table below.

We next ran each model type using these 1,000 draws from the joint distribution of parameters, and used the QALY and cost outputs from this sequence of model runs to construct cost-effectiveness acceptability curves and frontiers. As can be seen in the Figure, the CEAFs for PSAs based on differential equations, discrete event simulation, and embedded Markov models were all overlapping. This confirms our qualitative conclusion from the main manuscript that these model types can (in expectation) yield identical decision outcomes.

By comparison, the CEAF for Markov models based on standard rate-to-probability conversion formulas are different. Again highlighting our primary results, the Figure outlines a shaded region (straddling a \$100,000/QALY threshold) where different decisions could be made depending on the modeling type and WTP used.

---

<sup>1</sup>A Halton sequence is a sequence of points within  $[0,1]$  that appear random but that uniformly cover a multidimensional space. This space could, in principle, be covered using random draws but it would take considerably more draws to ensure uniform coverage across the multidimensional parameter space.

| Model Parameters                                                                                         |            |              |              |               |                    |         |         |              |              |                |
|----------------------------------------------------------------------------------------------------------|------------|--------------|--------------|---------------|--------------------|---------|---------|--------------|--------------|----------------|
|                                                                                                          | Short Name | PSA Value    | Distribution | Standard Mean | Standard Deviation | Maximum | Minimum | Beta Shape 1 | Beta Shape 2 | Mean (Poisson) |
| DES simulations to perform (1000s)                                                                       | n          | 1,000,000.00 | Normal       | 1,000,000.00  | 0.00               |         |         |              |              |                |
| Diff Eq Time step for DEQ approach.                                                                      | resolution | 0.02         | Normal       | 0.02          | 0.00               |         |         |              |              |                |
| Markov Interval.                                                                                         | interval   | 1.00         | Normal       | 1.00          | 0.00               |         |         |              |              |                |
| Time horizon (years) of simulation.                                                                      | horizon    | 40.00        | Normal       | 40.00         | 0.00               |         |         |              |              |                |
| Willingness to pay threshold used for NMB (\$1000s)                                                      | wtp        | 100,000.00   | Normal       | 100,000.00    | 0.00               |         |         |              |              |                |
| Shape Parameter from Gompertz model of secular death for 40yr female fit from 2012 Social Security data. | shape      | 0.10         | Normal       | 0.10          | 0.00               |         |         |              |              |                |
| Rate Parameter from Gompertz model of secular death for 40yr female fit from 2012 Social Security data.  | rate       | 0.00         | Normal       | 0.00          | 0.00               |         |         |              |              |                |
| Probability of ordering the genetic test.                                                                | p_o        | 1.00         | Uniform      |               |                    | 1.00    | 0.00    |              |              |                |
| Probability of death from adverse drug event.                                                            | p_bd       | 0.10         | Beta         |               |                    |         |         | 10.00        | 90.00        |                |
| Population prevalence of genetic variant.                                                                | p_g        | 0.20         | Beta         |               |                    |         |         | 20.00        | 80.00        |                |
| Condition indication duration (in years)                                                                 | r_a_dur    | 10.00        | Uniform      |               |                    | 20.00   | 0.00    |              |              |                |
| Adverse drug event duration (in years)                                                                   | r_b_dur    | 1.00         | Uniform      |               |                    | 2.00    | 0.01    |              |              |                |
| Relative risk of adverse drug event   Genetic variant present and alternative therapy prescribed.        | rr_b       | 0.80         | Uniform      |               |                    | 1.00    | 0.60    |              |              |                |
| Initial cost of condition (\$1000s).                                                                     | c_a        | 10,000.00    | Poisson      |               |                    |         |         |              |              | 10,000.00      |
| Cost of adverse drug event survival (\$1000s).                                                           | c_bs       | 25,000.00    | Poisson      |               |                    |         |         |              |              | 25,000.00      |
| Cost of adverse drug event case fatality (\$1000s).                                                      | c_bd       | 20,000.00    | Poisson      |               |                    |         |         |              |              | 20,000.00      |
| Cost of standard drug therapy.                                                                           | c_tx       | 0.25         | Poisson      |               |                    |         |         |              |              | 91.25          |
| Cost of alternate drug therapy.                                                                          | c_alt      | 3.00         | Poisson      |               |                    |         |         |              |              | 1,095.00       |
| Cost of genetic test.                                                                                    | c_t        | 200.00       | Uniform      |               |                    | 400.00  | 0.00    |              |              |                |
| Disutility of developing condition.                                                                      | d_a        | 0.05         | Beta         |               |                    |         |         | 5.00         | 95.00        |                |
| Disutility duration (years) after developing condition.                                                  | d_at       | 1.00         | Uniform      |               |                    | 1.00    | 1.00    |              |              |                |
| Lifetime disutility of adverse drug event among survivors.                                               | d_b        | 0.15         | Beta         |               |                    |         |         | 15.00        | 85.00        |                |
| Discount Rate.                                                                                           | disc       | 0.03         | Normal       | 0.03          | 0.00               |         |         |              |              |                |

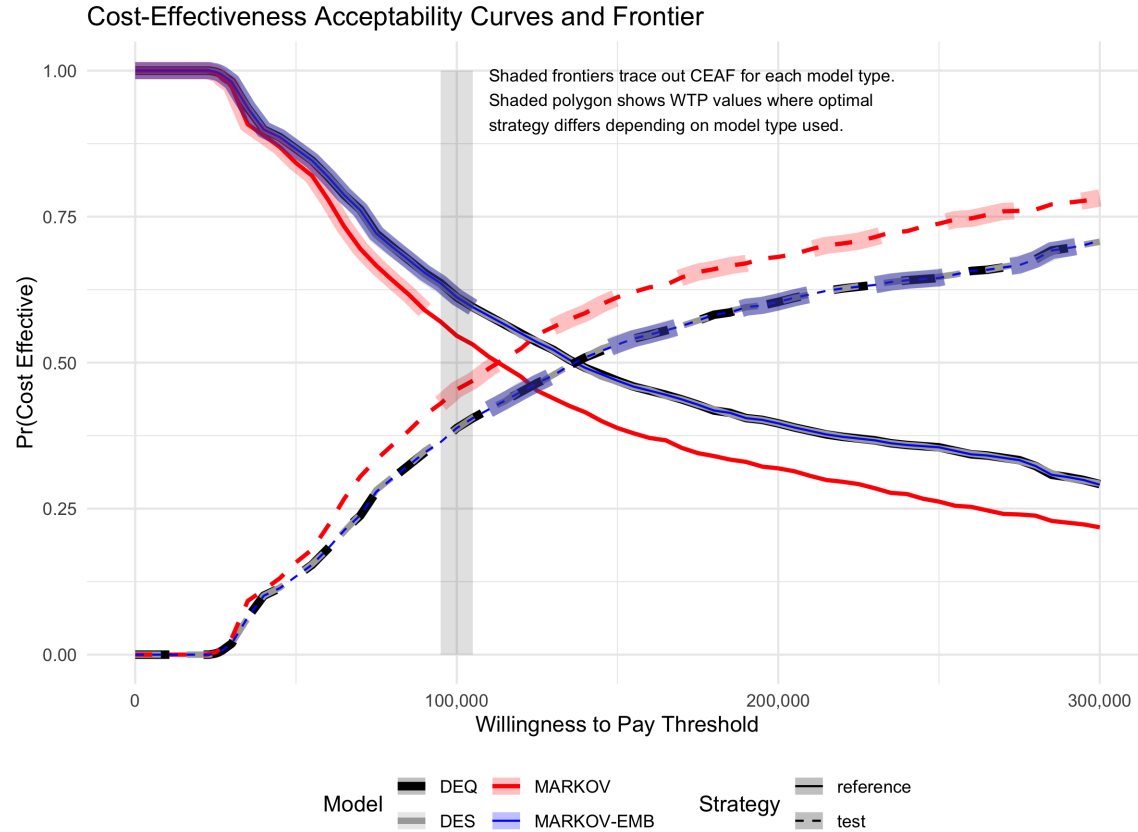

## 2 How Does Truncation Error Affect Model Variability?

The main text notes that one source of error in discrete-time models derives from “truncation error,” or the loss of information when the precise timing of events is “truncated” to occur at time-cycle boundaries. In the figure below, we demonstrate how this process can impact the variability of results.

To do so we build a “straw-man” model which takes our discrete event simulation (DES) and truncates event times at a specified (one year or one month) time boundary. While truncating a DES model would never be done in practice, this exercise is useful because it allows us to isolate the addition of model output variance attributable to the truncation process.

As seen in the figure, for any given simulated sample size, truncation error both increases the variability and bias (especially at one-year truncation) of NMB relative to the deterministic NMB value from the differential equation (DEQ) model.

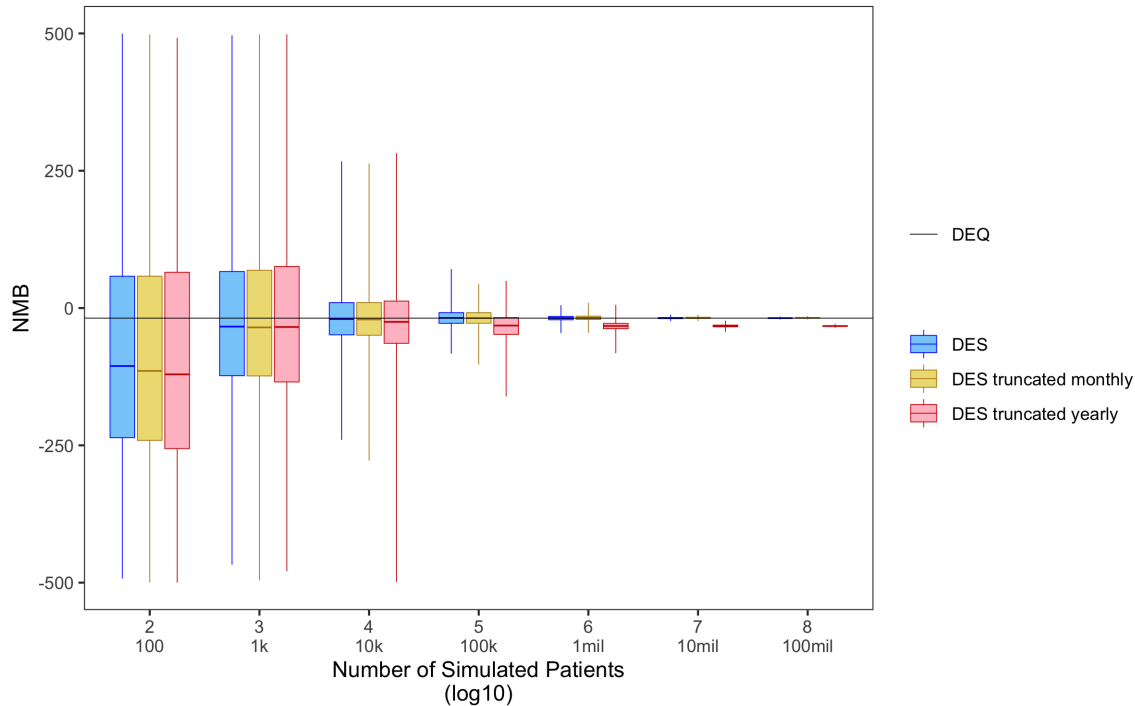

### 3 Why do Microsimulation results not converge with DEQ?

Our main results (Figure 1) show that when properly embedded, discrete time and state Markov models yield nearly identical average outcomes as differential equations models. However, even the embedded microsimulation model does not quite converge. Why is this?

One potential reason for this nonconvergence merits additional discussion because it highlights an additional limitation of microsimulation. In our model application, the adverse event occurs downstream of the drug indication. Thus, the probability of both drug indication and an adverse event both occurring within a yearly (or even monthly) time cycle is non-zero. A properly embedded transition matrix would include both a probability of transitioning from “healthy” to “indication,” as well as a probability of transitioning from “healthy” to “adverse event” (with non-Markovian accumulators added to capture the sojourn through “indication”). Critically, however, these embedded probabilities change depending on the decision to place the patient on the alternative drug. For example, the probability of a transition from “healthy” to “adverse event” within a time step is smaller if the alternative drug was used, since the risk of an adverse event is lower in that case. Because the overall (marginal) probability of drug indication is fixed (PGx only affects which drug is prescribed, not the drug indication itself), this would result in a higher probability transition from “healthy” to “indication” if the patient received the alternative drug. In other words, the initial probability of transition from “healthy” to “indication” changes depending on downstream decisions in the model. This cart-and-horse problem complicates the structure and execution of microsimulation because it requires that all potential decisions be modeled before a patient can transition through the model. To address it, a microsimulation model must either first solve a Markov model to determine the correct probabilities, or must be structured more similarly to a DES.

### 4 Markov Modeling: Best Practices, Code and Examples

This section provides advice on best practices for embedding literature-based parameters into discrete-time Markov models so that the final transition probabilities accurately represent the underlying continuous time process.

## 4.1 Rates vs. Percentages

It is common to draw upon literature-based parameters when constructing a Markov model. A key first step is to assess the parameters of interest in a published study. For a given paper with published rates, this means determining whether they report a percentage affected in a given time step, or continuous rates. While the units of both of these are essentially equivalent (by a factor of 100), the interpretation is different. It is a subtle but important difference.

For example, let's assume that a stochastic event occurs to a group of individuals with a rate of 1/unit time. This follows an exponential distribution. We first create a sample of 20000 individuals.

```
x <- rexp(20000)
```

```
hist(x)
```

**Histogram of x**

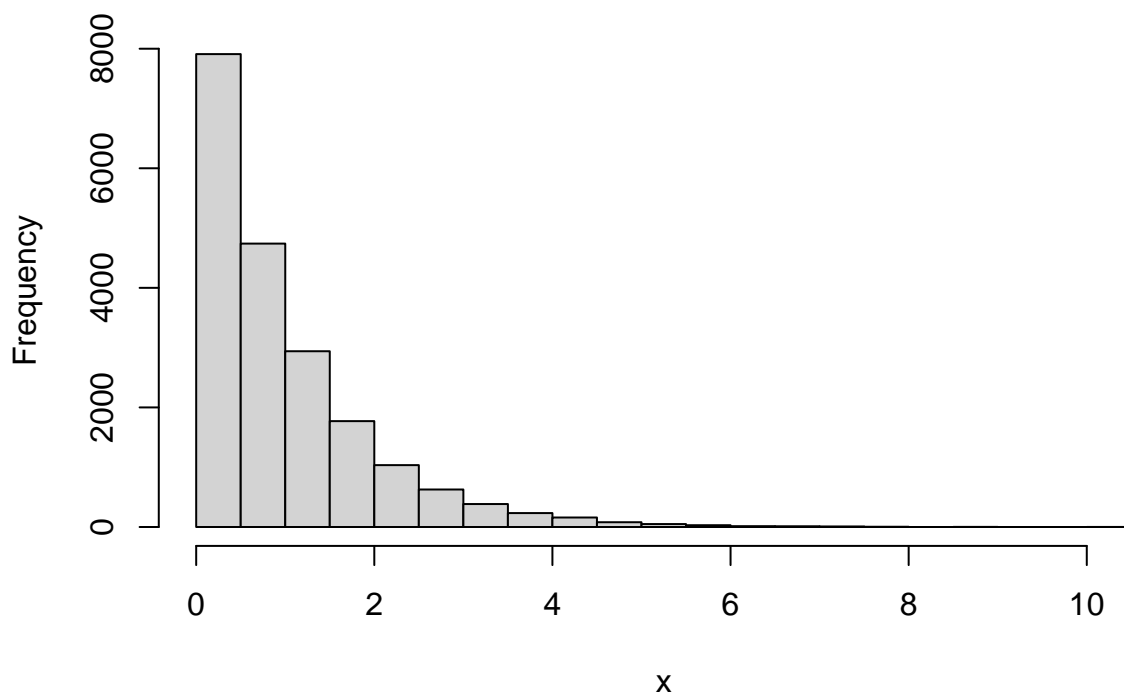

```
mean(x)
```

```
## [1] 0.9940002
```

```
median(x)
```

```
## [1] 0.6850423
```

```
# Percentage in first time cycle
```

```
sum(x < 1) / length(x)
```

```
## [1] 0.6325
```

The mean is close to 1, but the percentage observed in the first time cycle is close to the theoretical 63.2%. This appears counter-intuitive but the long tail of the exponential distribution creates a situation where the continuous rate is not the observed percentage in a time cycle.

This leads to the widely-used rate-to-probability conversion formula:

$$p = 1 - e^{-r}$$

$$r = -\log(1 - p)$$

where  $p$  represents the probability in a unit of time and  $r$  represents the continuous rate.

When constructing a Markov model, it is best to start with the continuous rate when aggregating from many sources and embed this continuous rate into a timestep—thus creating probability transitions for each time step.

To find the probability transition matrix of a timestep in Markov modeling from the continuous the following formula is used:

$$T_{prob} = e^R$$

Where  $R$  is the continuous rate matrix, and each diagonal is the negative sum of the rest of the row elements.  $T_{prob}$  is the transition probability for a single time step, where each diagonal is 1 - the sum of the other row elements.

One could have rates that change at each time step and this would return the proper embedding of the rates allowing for them to compete.

## 4.2 Competing Events

What if a given source of data provides observed transition probabilities and these are exclusionary states, i.e., competing? How could one reverse these probabilities and embed other competing events into the model?

To do this, one must solve for the generator matrix of the transition probability matrix using eigenvalue decomposition. Note that this is not always possible, as it is trivial to construct a transition probability matrix that has no generator.

Consider the following, which builds on the example provided in the main text. We wish to approximate a continuous time process using a discrete-time Markov model with three distinct states: A (healthy), B (sick/intervention), and C (complication from intervention). Moreover, in continuous time, this process proceeds sequentially, i.e., A->B->C.

A (naively) specified model has transitions from A->B and from B->C specified as probabilities within the selected time step. As noted in the main text, this model cannot truly approximate continuous time process, as within a given time step there is a non-zero probability of transitioning from healthy to complication (i.e., A->C, with an implied sojourn through B). That is, during a timestep it is possible to transition from A->C.

By incorrectly specifying all transitions, it makes it impossible to find a proper generator—though eigenvalue decomposition can be used to get as close as possible. If negative rates of transition are found using eigenvalue decomposition, then probabilities inconsistent with continuous rates have been specified.

In mathematical terms, the generator matrix is the matrix logarithm of the transition probability matrix. A matrix has a logarithm *if and only if* if it is invertible.

$$A = \log T_{prob}$$

The log can be found using spectral or eigenvalue decomposition. If  $V$  is a matrix where equal column is an eigenvector of  $T_{prob}$ , then,

$$A' = V^{-1}AV$$

$$\log T_{prob} = V(\log A')V^{-1}$$

### 4.2.1 Can I Work Backwards from Transition Probabilities? An Example.

As an example, we'll consider a model from "Decision Modelling for Health Economic Evaluation" by Briggs, Clatxon, and Sculpher. In Table 2.2, they define a transition probability matrix for HIV monotherapy that was derived from observed percent transitions in a patient cohort.

```
hiv_monotherapy_tp <- matrix(c(0.721, 0.202, 0.067, 0.010,
                               0.000, 0.581, 0.407, 0.012,
                               0.000, 0.000, 0.750, 0.250,
                               0.000, 0.000, 0.000, 1.000),
                              nrow=4, byrow=TRUE,
                              dimnames=list(c("A", "B", "C", "D"),
                                             c("A", "B", "C", "D")))
```

```
hiv_monotherapy_tp
```

```
##      A      B      C      D
## A 0.721 0.202 0.067 0.010
## B 0.000 0.581 0.407 0.012
## C 0.000 0.000 0.750 0.250
## D 0.000 0.000 0.000 1.000
```

The bottom diagonal was corrected to be a Markov absorbing state by having 1 on the diagonal. For the purposes of example, we'll assume we wish to add an additional state "E", which has a continuous rate of 0.2 that competes with other transitions.

To accomplish this we must find the continuous generator.

```
V <- eigen(hiv_monotherapy_tp)$vectors
iV <- solve(V)
Ap <- iV %*% hiv_monotherapy_tp %*% V
```

```
Ap
```

```
##           [,1]           [,2] [,3]           [,4]
## [1,] 1.000000e+00 -3.918669e-17 0.000 -1.625347e-17
## [2,] 1.776357e-15 7.500000e-01 0.000 1.565421e-16
## [3,] -1.776357e-15 -2.220446e-16 0.721 -2.220446e-16
## [4,] -3.330669e-16 -5.551115e-17 0.000 5.810000e-01
```

Due to the numeric probabilities not being exactly correct, the off-diagonal elements of  $A'$  are not zero, but they are quite close. We will zero these off diagonal elements and assume that the non-zero elements are numerical error. Then continue by taking the log of the diagonal.

```
lAp <- diag(log(diag(Ap)), nrow(Ap), ncol(Ap))
```

```
R <- V %*% lAp %*% iV
```

```
R
```

```
##           [,1]           [,2]           [,3]           [,4]
## [1,] -0.3271161 3.114961e-01 2.439536e-03 1.318051e-02
## [2,] 0.0000000 -5.430045e-01 6.148890e-01 -7.188445e-02
## [3,] 0.0000000 -7.064112e-18 -2.876821e-01 2.876821e-01
## [4,] 0.0000000 8.178549e-33 1.479114e-31 -3.330669e-16
```

Now we have the continuous time rate generator for the Markov Model. There is still some numerical error—for example the bottom row, has values very near to zero, and the diagonal is not exactly the negative sum of the rest of the row. We can clean this up by tweaking the numbers numerical towards their constraints.



```
R[abs(R) < 1e-6 ] <- 0

rownames(R) <- c("A", "B", "C", "D")
colnames(R) <- c("A", "B", "C", "D")

round(R, 3)
```

```
##      A      B      C      D
## A -0.327  0.311  0.002  0.013
## B  0.000 -0.543  0.615 -0.072
## C  0.000  0.000 -0.288  0.288
## D  0.000  0.000  0.000  0.000
```

Some numerical error is inevitable in this process and cannot be avoided. However, even cleaning up the small and obvious errors, the transition from B -> D is impossible since it's negative. Rates are relative to the occupancy of the source state, in this case B. Having a negative rate implies that B would have some transitions in which the dead come alive into B based upon the occupancy of B. Obviously, this is not possible. The problem now is how to adjust the model's rates to be physically possible, while as faithful to the original data as possible. B is a sicker state, so it should have a higher death rate.

First, let's double check it recapitulates the original rates.

```
expm(R)

## 4 x 4 Matrix of class "dtrMatrix"
##      A      B      C      D
## A 0.721 0.202 0.067 0.010
## B . 0.581 0.407 0.012
## C . . 0.750 0.250
## D . . . 1.000
```

Which exactly matches the original transition probability table given.

Next, let's assume that one has to pass into state C to die and the original data didn't have frequent enough measurements to detect all the transitions.

```
# A more plausible death rate for 'A', 'B'
R['A', 'D'] <- 0
R['B', 'D'] <- 0

diag(R) <- diag(R) - rowSums(R) # Keep it Markovian
round(expm(R), 3)
```

```
## 4 x 4 Matrix of class "dtrMatrix"
##      A      B      C      D
## A 0.731 0.197 0.066 0.007
## B . 0.541 0.393 0.066
## C . . 0.750 0.250
## D . . . 1.000
```

The rate from A->D is within error of the original study. However, deaths from B are at a much higher rate. This is all under the assumption that one must pass through C to die, and the adjusted transitions reflect this.

Now one could add a competing event to to the model as a rate adding a new row column with it's defined rates and compute the updated transition probability matrix.

These difficulties of working backward from probabilities underscore the importance of having the original estimates be rates that have been adjusted to be the non-competing rate (e.g., based on survival models).

### 4.3 State Jumping

The above examples also illustrate another difficulty: correctly summarizing costs and utilities in the presence of implied “jumpover” states. For example, we zeroed the rate of A->D, yet the final transition matrix contains that transition.

Assume that the transition B->C entailed a cost, given that some of the population goes A->B->C->D these transitions are hidden in the embedded transition matrix, yet a summary of the number of B->C transitions is needed for a time step. One can solve this by adding non-Markovian states or accumulator states to track these transitions.

The diagonal term of the transition intensity matrix is the negative sum of all *Markovian* states. Additional rows and columns can be added that violate the principal that total state occupancy cannot be created or destroyed, by simply leaving them out of the balancing term of the diagonal.

```
RwAcc <- cbind(rbind(R, rep(0, 4)), rep(0, 5))
rownames(RwAcc) <- c("A", "B", "C", "D", "AccBC")
colnames(RwAcc) <- c("A", "B", "C", "D", "AccBC")

RwAcc['B', 'AccBC'] <- RwAcc['B', 'C']
round(expm(RwAcc), 3)
```

```
## 5 x 5 Matrix of class "dtrMatrix"
##      A      B      C      D AccBC
## A    0.731 0.197 0.066 0.007 0.071
## B      . 0.541 0.393 0.066 0.459
## C      .      . 0.750 0.250 0.000
## D      .      .      . 1.000 0.000
## AccBC .      .      .      . 1.000
```

Note that once embedded into probabilities, there is a transition from A->AccBC which tracks how many transitions from A->B->C and B->C occur. The original rate specified was zero for A->AccBC, but due to jumping states this now has a non-zero probability and the accumulator is able to track this.

Ideally the original rate estimates would have assumed a structural model that was sensible and rates could be estimated to match the data. This is a statistical modeling problem outside the scope of this appendix.

For the sake of organization, it is recommended that the upper left matrix remain the original Markov and all the non-Markovian rows be to the bottom and right of the matrix.

### 4.4 Non-stationary Rates

Another problem that occurs is that of non-stationary rates. What if a rate is changing over an interval time step? How is this best modeled? A first order approach would be to simply take the mean of the rates at either time point. A higher order approach is to integrate the total risk exposure over the time interval.

$$r_e = \int_{t_1}^{t_2} r(t) dt$$

This computes the effective rate  $r_e$  from a time varying rate,  $r(t)$ .

For example, in our applications the probability of death from outside causes could be modeled based on mortality tables using a Gompertz distribution with a shape  $a$  and rate  $b$  parameter. The hazard function of a distribution is the continuous rate function. The hazard function can be derived from the probability density function (PDF) divided by 1 minus cumulative probability function (CDF). For the Gompertz this is,

$$h(t) = \frac{f(t)}{1 - F(t)} = \frac{be^{at}e^{-b/a(e^{at}-1)}}{e^{-b/a(e^{at}-1)}} = be^{at}$$

From this the effective rate over a timestep of a discrete Markov simulation can be computed.

$$r_e = \int_{t_1}^{t_2} be^{at} dt = \frac{b}{a}(e^{at_2} - e^{at_1})$$

While this exists as an analytical result, in general it's better to use the effective risk over a time interval as this leads to improved accuracy of a simulation.

## 5 Tunnel States

Tunnel states by definition are non-Markovian. However, they cannot be treated as accumulators, i.e., defined before exponentiation. This is due to their rates being infinite. This requires that the transition matrix be modified directly after computation. Enter the rates as zero, then modify post matrix exponentiation. A full example is below in the section 'Bringing it All Together'

## 6 Rescaling and Integration

It may be tempting to simply rescale the time scale to improve the accuracy of the Markov simulation (i.e., use a daily time step rather than monthly or yearly, as this reduces the likelihood that multiple competing events occur within a time step). While this is true in principle, without using the tools above for embedding rates it leads to higher numerical error and has the opposite of the intended effect. To rescale this is done at the matrix exponentiation stage of the matrix.

$$T_p = e^{Rt}$$

Where  $t$  is the new time scaling factor. For example, if the rate matrix  $R$  is in units of events per year and a monthly simulation is desired,  $t = \frac{1}{12}$ , thus Monthly  $T_p = e^{R/12}$ .

Another commonly-used method to improve accuracy when adding cost or utility over a simulation result is that of the half-cycle correction or the life table method. We recommend against using these corrections, as they are simply Newton's trapezoidal method for integrating evenly spaced points.

The current state of the art in this area is the *alternate extended Simpson's rule* which estimate higher order terms of rate of change of the function. In most health economic applications the overall change in curvature is acceptably smooth and this technique returns accurate results.

The *alternate extended Simpson's rule* to integrate a curve is as follows:

$$\int_a^b x(t)dt \approx \frac{h}{48} \left[ 17x_0 + 59x_1 + 43x_2 + 49x_3 + \sum_{i=4}^{n-4} x_i 49x_{n-3} + 43x_{n-2} + 59x_{n-1} + 17x_n \right]$$

Where  $a$  and  $b$  represent the time window of the simulation,  $x(t)$  is the theoretical function that is being summed,  $h$  is the width of the time step, and  $x_i$  is the simulation result at time point  $i$ .

This method requires at least 8 time points. If one's simulation is shorter, there are shorter versions of Simpson's rules with fewer higher order terms.

In general with accurate time step embedding of rates and Simpson's rules, rescaling is not required. If one does rescaling, compare the existing time points from the bigger timestep to the smaller—they should line up exactly. If they don't line up, then rescaling is not being done properly.

## 7 From Soup to Nuts: A Fully-Executed Example

We conclude with a simple example that brings all of these techniques together.

We will assume there exists a state “H” healthy, A condition “A” and death from “A” and death from outside causes. An individual of our target population develops “A” at a rate of 0.1. Individuals with “A” die at a rate of 0.3. Secular death can occur from “H” or “A” with Gompertz distribution with a shape  $a = 0.1$  and rate  $b = 1/1200$ . “A” incurs a one time cost of \$1000. Existing in state “A” has a disutility of 0.2 for 2 years. We wish to simulate a 20-year time horizon.

```
SD <- (H -> A) -> AD
```

First we define our effective death rate function for a given time step using the Gompertz hazard integration above.

```
rate_secular_death_by_age <- function(t, h=1, a=0.1, b=1/1200)
{
  (b/a) * (exp(a*t) - exp(a*(t-h)))
}
```

Next we define our Markovian embeddable rate transition matrix.

```
markov_rate_matrices<- function(t, h=1)
{
  lapply(t, function(tt){
    r.secular <- rate_secular_death_by_age(tt+40, h)

    x <- matrix(c(0.0, 0.1, 0.0, r.secular,
                 0.0, 0.0, 0.3, r.secular,
                 0.0, 0.0, 0.0, 0.0,
                 0.0, 0.0, 0.0, 0.0),
               nrow=4,
               ncol=4,
               byrow=TRUE,
               dimnames=list(c("H", "A", "DA", "DS"),
                             c("H", "A", "DA", "DS")))

    diag(x) <- -rowSums(x)
    x
  })
}
```

We modify the matrix to include an accumulator ‘ACC’ for death from A ‘DA’ entry. Technically this wouldn’t be required as ‘DA’ is an absorbing state, but for the purposes of example it is included.

We will also create a T1 and T2 state for tracking tunnels and allow exit from due to external death. This requires us to have a receiving bucket for these external risks ‘N’ for NULL so as not to disturb the balance of the Markov.

```
non_markov_rate_matrices <- function(t, h=1)
{
  markov <- markov_rate_matrices(t, h)
  non_markov <- list()
  for(i in t)
  {
    # Expand matrix
    non_markov[[i]] <- cbind(markov[[i]], matrix(rep(0, 16), nrow=4))
    non_markov[[i]] <- rbind(non_markov[[i]], matrix(rep(0, 32), nrow=4))
  }
}
```

```

}

lapply(non_markov, function(m){
  # Put in State Names
  rownames(m) <- c("H", "A", "DA", "DS", "ACC", "T1", "T2", "N")
  colnames(m) <- c("H", "A", "DA", "DS", "ACC", "T1", "T2", "N")

  # Define Accumulator
  m["H", "ACC"] <- m["H", "A"]

  # Define Tunnel state entry
  m["H", "T1"] <- m["H", "A"]

  m # Note: Tunnel states are not fully defined at this point.
})
}

```

Next we embed the non-Markovian matrices into the time step and finish the definition of the tunnel states in the probability space.

```

transition_prob <- function(t, h=1)
{
  # Embed the matrices into the timesteps
  tp <- lapply(non_markov_rate_matrices(t, h), function(m) expm(m*h))

  lapply(tp, function(m)
  {
    # It is possible to exit tunnel to external risk of death
    m["T1", "N"] <- m["A", "DA"] + m["A", "DS"]
    m["T1", "T1"] <- 0 # Cannot remain in tunnel
    m["T1", "T2"] <- 1-m["T1", "N"] # The tunnel is everything else

    # T2 is terminal state
    m["T2", "T2"] <- 0
    m["T2", "N"] <- 1

    # Note: At this point, the "N" state could be stripped as it was
    # only required for the embedding, and serves no other purpose
    # at this point

    states <- c("H", "A", "DA", "DS", "ACC", "T1", "T2")
    m[states, states]
  })
}

```

Now the simulation matrices are fully defined at each timestep, and it can be run versus a starting population.

```

Y <- t(c(H=1, A=0, DA=0, DS=0, ACC=0, T1=0, T2=0))

simulation <- do.call(rbind, lapply(transition_prob(1:20), function(tp) {
  Y <<- Y %*% tp
}))

```

```
simulation <- rbind(
  c(H=1, A=0, DA=0, DS=0, ACC=0, T1=0, T2=0),
  simulation
)
```

Let's plot the trajectories of the simulation.

```
plot(0:20, simulation[, "H"], ylim=c(0,1), typ="l", ylab="ratio of total population", xlab="Year")

lines(0:20, simulation[, "A"], col="red", lty=2, lwd=2)
lines(0:20, simulation[, "DA"], col="blue", lty=3, lwd=2)
lines(0:20, simulation[, "DS"], col="darkgreen", lty=4, lwd=2)
lines(0:20, simulation[, "ACC"], col="orange", lty=5, lwd=2)
lines(0:20, rowSums(simulation[, c("T1", "T2")]), col="purple", lty=6, lwd=2)

legend(5, 1.0, c("H", "A", "DA", "DS", "ACC", "T"), lty=1:6,
      col=c("black", "red", "blue", "darkgreen", "orange", "purple"), cex=0.8, lwd=2)
```

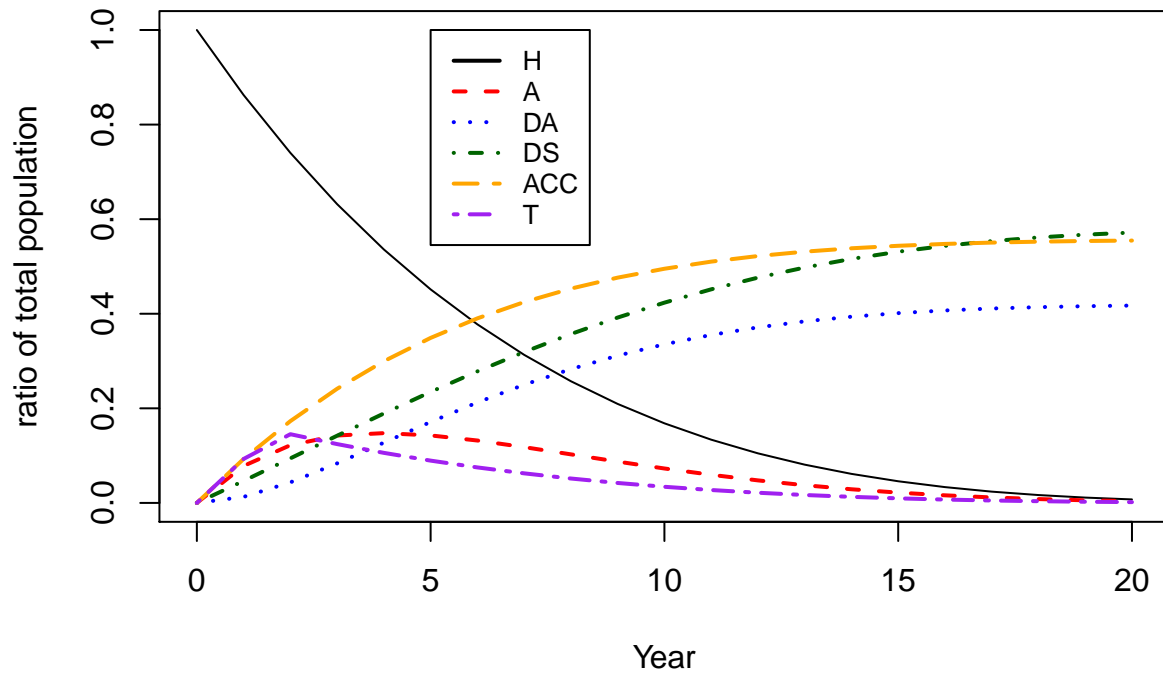

## 7.1 Numerical Checkpoint

A good check at this point is to see if the simulation kept the total population consistent, i.e., neither created nor destroyed occupants of the Markov simulation. If the plot strays far from zero, then something is wrong in constructing the model.

```
plot(0:20, 1-rowSums(simulation[, c("H", "A", "DA", "DS")]), xlab="time (years)",
      ylab="absolute error", main="Total Population Numerical Error")
```

## Total Population Numerical Error

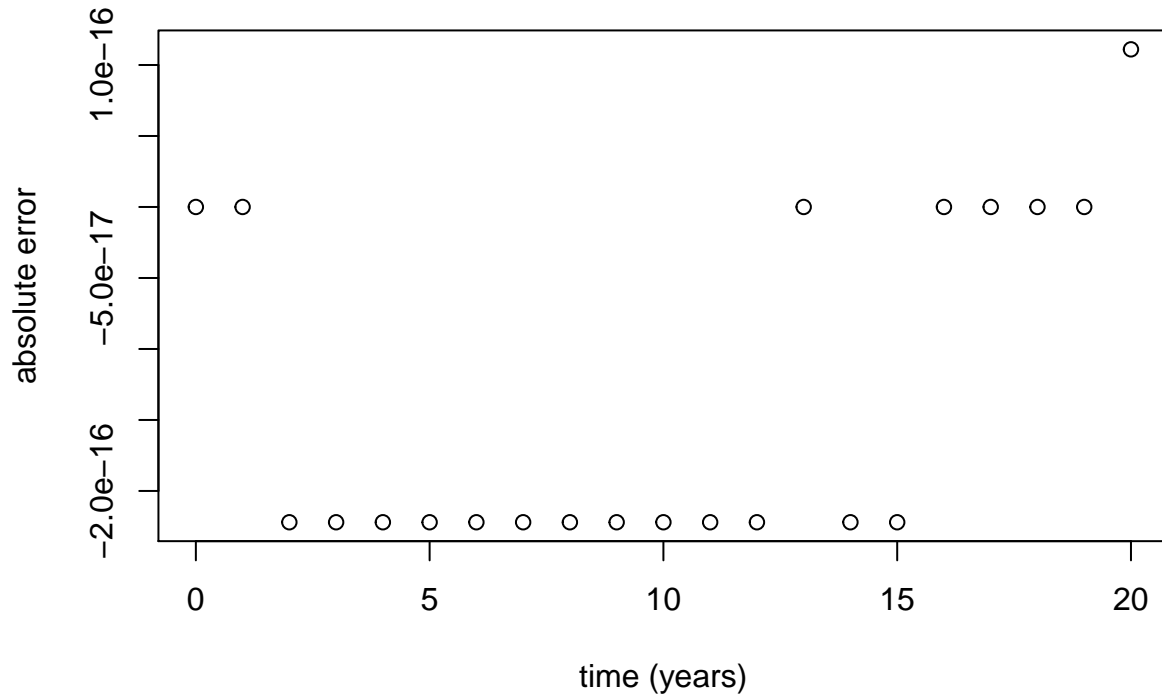

Now with the simulation complete and passing a simple check, one can proceed to integrate costs and qualities.

First let's define the alternate Simpson's coefficient function for integration.

```
# Better accuracy than "life-table" aka trapezoidal method
alt_simp_coef <- function(i) c(17, 59, 43, 49, rep(48, i-8), 49, 43, 59, 17) / 48
alt_simp      <- function(x,h) h*sum(alt_simp_coef(length(x)) * x)
```

### 7.1.1 Costs

```
1000*simulation[21,"ACC"] # The last point is the total
```

```
##      ACC
## 554.7587
```

### 7.1.2 Quality-Adjusted Life Years

Total possible life years:

```
alt_simp(rowSums(simulation[,c("H", "A")]), 1)
```

```
## [1] 6.943292
```

Total Disutility of 'A' (via the tunnel states):

```
alt_simp(rowSums(simulation[,c("T1", "T2")]), 1)
```

```
## [1] 0.9392552
```

Final quality-adjusted life years:

```
alt_simp(rowSums(simulation[,c("H", "A")]), 1) -
alt_simp(rowSums(simulation[,c("T1", "T2")]), 1)
```

## [1] 6.004037
